# Supplementary material for: Microwave-assisted synthesis of nitrogen-doped activated carbon as an oxygen reduction catalyst in microbial fuel cells
Source: Royal Society of Chemistry journal article supplement (doi:10.1039/c6ra14387c), 2016-01-01
Supplement: c6ra14387c1.pdf [file c6ra14387c1.pdf]

**Microwave-assisted synthesis of nitrogen-doped activated carbon as oxygen  
reduction catalyst in microbial fuel cells**

Haiman Wang<sup>a</sup>, Da Li<sup>a</sup>, Jia Liu<sup>a\*</sup>, Luchang Liu<sup>b</sup>, Xiangtong Zhou<sup>a</sup>, Youpeng Qu<sup>a,c</sup>,  
Jie Zhang<sup>a</sup>, Yujie Feng<sup>a\*</sup>

<sup>a</sup>State Key Laboratory of Urban Water Resource and Environment, Harbin Institute of  
Technology. No 73 Huanghe Road, Nangang District, Harbin 150090, China

<sup>b</sup>School of Environment, Liao Ning University. No.66 Chongshan Road, Huanggu  
District, Shenyang 110000, China

<sup>c</sup>School of Life Science and Technology, Harbin Institute of Technology. No. 2  
Yikuang Street, Nangang District, Harbin 150080, China

\*Corresponding Author:

E-mail:[yujief@hit.edu.cn](mailto:yujief@hit.edu.cn); phone: (+86)451-86287017

Fax: (+86) 451-86287017;

\* Co-Corresponding Author:

E-mail:[jia14921@163.com](mailto:jia14921@163.com)

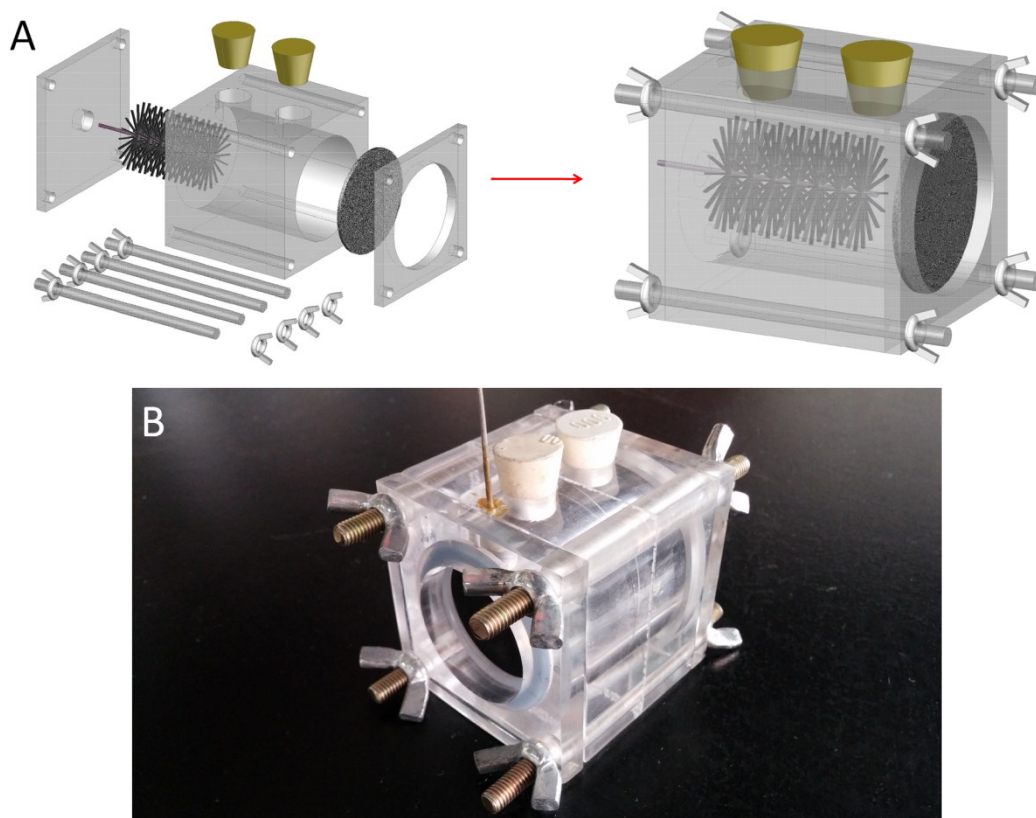

Fig. S1 (A) Schematic diagram, and (B) photo of the single-chamber, air-cathode MFC

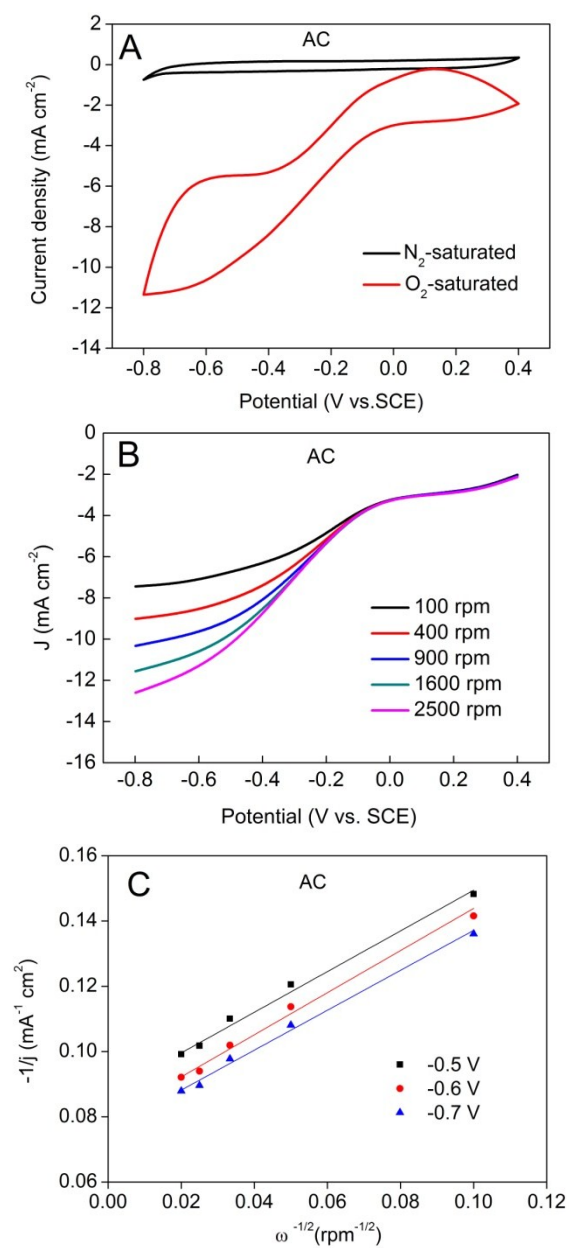

Fig. S2 (A) CVs for AC catalyst in  $N_2$ -saturated and  $O_2$ -saturated neutral PBS (B) LSVs for AC catalyst in  $O_2$ -saturated neutral PBS at different rotating rates (C) Koutecky–Levich plots for AC catalyst at different electrode potentials

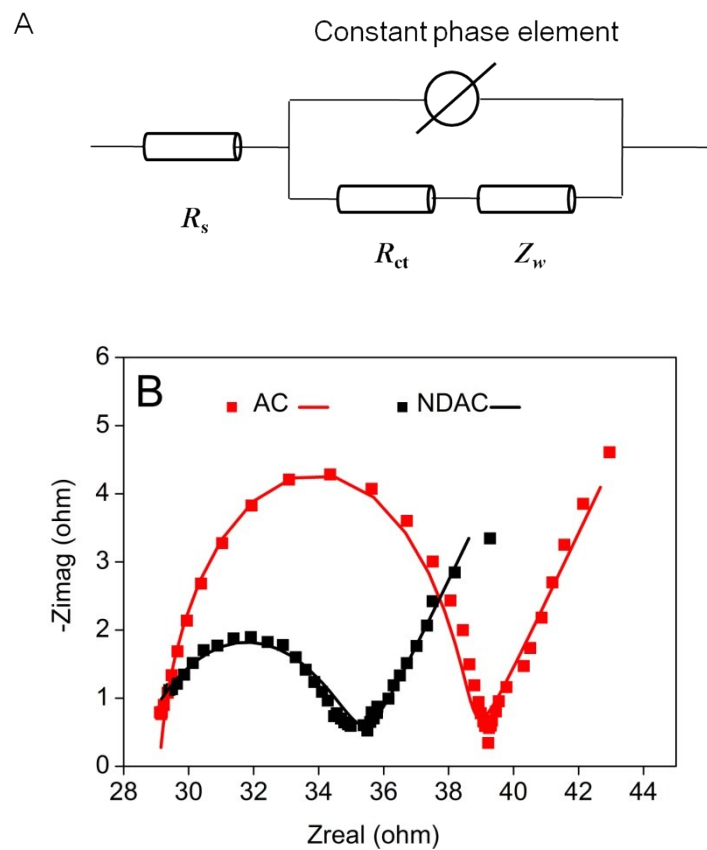

Fig. S3 (A) Equivalent circuit for the simulation of electrochemical impedance spectroscopy (EIS) ( $R_s$ : solution resistance;  $R_{ct}$ : charge transfer resistance;  $Q$ : constant-phase element;  $Z_w$ : diffusion resistance) (B) Nyquist plots of EIS for DNAC and AC cathodes over a frequency range of 100 kHz to 1 mHz with the amplitude of 10 mV
